# Supplementary material for: An investigation of the structural and electronic origins of enhanced chemical looping air separation performance of B-site substituted SrFe1−xCoxO3−δ perovskites
Source: Royal Society of Chemistry journal article supplement (doi:10.1039/d4cp02152e), 2024-01-01
Supplement: d4cp02152e1.pdf [file d4cp02152e1.pdf]

## Supporting Information

### **An investigation of the structural and electronic origins of enhanced chemical looping air separation performance of B-site substituted $\text{SrFe}_{1-x}\text{Co}_x\text{O}_{3-\delta}$ perovskites**

Qianwenhao Fan<sup>a,b</sup>, Haiyan Li<sup>c</sup>, Syed Saqline<sup>a,b,d</sup>, Felix Donat<sup>e</sup>, Mingwu Tan<sup>f</sup>, Longgang Tao<sup>f</sup>, Christoph Müller<sup>e</sup>, Zhichuan J. Xu<sup>g</sup>, Wen Liu<sup>a,b,d\*</sup>

<sup>a</sup> School of Chemistry, Chemical Engineering and Biotechnology, Nanyang Technological University, 62 Nanyang Drive, Singapore 637459, Singapore

<sup>b</sup> Cambridge Centre for Advanced Research and Education in Singapore, 1 Create Way, Singapore 138602, Singapore

<sup>c</sup> College of Chemical and Biological Engineering, Zhejiang University, Hangzhou, 310027, China

<sup>d</sup> Nanyang Environmental and Water Research Institute, Nanyang Technological University, 1 Cleantech Loop, Singapore 637141, Singapore

<sup>e</sup> Department of Mechanical and Process Engineering, ETH Zurich, Leonhardstrasse 21, 8092 Zürich, Switzerland

<sup>f</sup> Institute of Sustainability for Chemicals, Energy and Environment, Agency for Science, Technology and Research (A\*STAR), 1 Pesek Road, Jurong Island, 627833, Singapore

<sup>g</sup> School of Materials Science and Engineering, Nanyang Technological University, Singapore 639798, Singapore

\* Corresponding Author: Wen Liu ([wenliu@ntu.edu.sg](mailto:wenliu@ntu.edu.sg))

Table S1. Amount of metal nitrates used in the sol-gel synthesis of perovskite oxygen carriers.

| Sample                                                                        | Metal nitrate precursors          |               |                                                      |               |                                                      |               |
|-------------------------------------------------------------------------------|-----------------------------------|---------------|------------------------------------------------------|---------------|------------------------------------------------------|---------------|
|                                                                               | Sr(NO <sub>3</sub> ) <sub>2</sub> |               | Fe(NO <sub>3</sub> ) <sub>3</sub> ·9H <sub>2</sub> O |               | Co(NO <sub>3</sub> ) <sub>2</sub> ·6H <sub>2</sub> O |               |
|                                                                               | Mass (g)                          | Amount (mmol) | Mass (g)                                             | Amount (mmol) | Mass (g)                                             | Amount (mmol) |
| SrFeO <sub>3-δ</sub> (SF)                                                     | 2.116                             | 10.0          | 4.040                                                | 10.0          | -                                                    | -             |
| SrFe <sub>0.75</sub> Co <sub>0.25</sub> O <sub>3-δ</sub> (SFC <sub>25</sub> ) | 2.116                             | 10.0          | 3.030                                                | 7.5           | 0.728                                                | 2.5           |
| SrFe <sub>0.5</sub> Co <sub>0.5</sub> O <sub>3-δ</sub> (SFC <sub>50</sub> )   | 2.116                             | 10.0          | 2.020                                                | 5.0           | 1.455                                                | 5.0           |
| SrFe <sub>0.25</sub> Co <sub>0.75</sub> O <sub>3-δ</sub> (SFC <sub>75</sub> ) | 2.116                             | 10.0          | 1.010                                                | 2.5           | 2.183                                                | 7.5           |

Table S2. The oxygen stoichiometry (3-δ) of the perovskite oxygen carriers determined by iodometric titration and N<sub>2</sub>-TPD method.

| Sample            | 3-δ (iodometric titration) | 3-δ (N <sub>2</sub> -TPD) |
|-------------------|----------------------------|---------------------------|
| SF                | 2.83                       | 2.81                      |
| SFC <sub>25</sub> | 2.75                       | 2.77                      |
| SFC <sub>50</sub> | 2.73                       | 2.73                      |
| SFC <sub>75</sub> | 2.68                       | 2.69                      |

Table S3. Oxygen carrying capacity of the perovskite oxygen carriers during the 50 redox swing cycles.

| Sample            | Oxygen carrying capacity (wt%) |          |          |          |          |          |
|-------------------|--------------------------------|----------|----------|----------|----------|----------|
|                   | Cycle 1                        | Cycle 10 | Cycle 20 | Cycle 30 | Cycle 40 | Cycle 50 |
| SF                | 0.61                           | 0.63     | 0.64     | 0.65     | 0.65     | 0.65     |
| SFC <sub>25</sub> | 0.75                           | 0.84     | 0.84     | 0.84     | 0.85     | 0.85     |
| SFC <sub>50</sub> | 1.02                           | 1.23     | 1.28     | 1.30     | 1.32     | 1.31     |
| SFC <sub>75</sub> | 1.34                           | 1.33     | 1.31     | 1.33     | 1.32     | 1.32     |

Oxygen carrying capacity = sample mass (ox) - sample mass (re), where (ox) and (re) represent the sample mass measured after the 10 min oxidation stage in air and 30 min reduction stage in N<sub>2</sub> in each cycle, respectively. For example, during cycle 1, Oxygen carrying capacity = sample mass (10 min) - sample mass (40 min).

Table S4. Summary of XRD refinement results of as-synthesized perovskite samples.

| Sample            | Space group | Lattice constant<br>$a = b = c$ (Å) | Volume<br>(Å <sup>3</sup> ) | Mean crystallite size $D$ (nm) | Dislocation density $\delta \times 10^{14}$<br>(lines/m <sup>2</sup> ) | Microstrain $\varepsilon \times 10^{-3}$ | $R_{wp}$ (%) |
|-------------------|-------------|-------------------------------------|-----------------------------|--------------------------------|------------------------------------------------------------------------|------------------------------------------|--------------|
| SF                | P m -3 m    | 3.867                               | 57.832                      | 49.37                          | 4.10                                                                   | 2.02                                     | 3.20         |
| SFC <sub>25</sub> | P m -3 m    | 3.866                               | 57.796                      | 44.96                          | 4.95                                                                   | 2.35                                     | 3.74         |
| SFC <sub>50</sub> | P m -3 m    | 3.865                               | 57.742                      | 44.87                          | 4.97                                                                   | 2.57                                     | 4.22         |
| SFC <sub>75</sub> | P m -3 m    | 3.864                               | 57.692                      | 46.66                          | 4.59                                                                   | 2.81                                     | 4.36         |

The dislocation density ( $\delta$ ) was estimated using the equation:  $\delta = 1/D^2$  (lines/m<sup>2</sup>)<sup>1</sup>

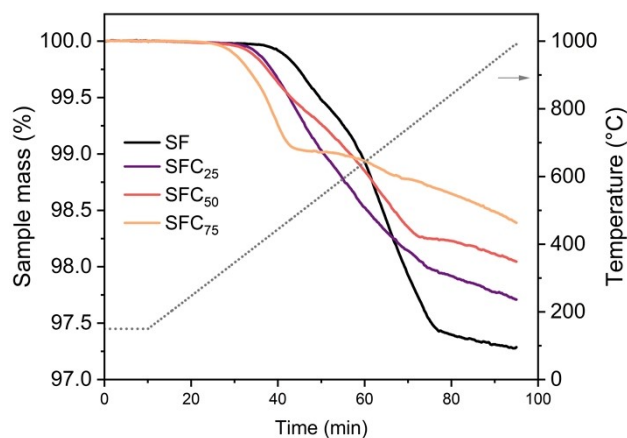

Figure S1. Weight loss curves in TGA during the temperature programmed desorption experiment in N<sub>2</sub>.

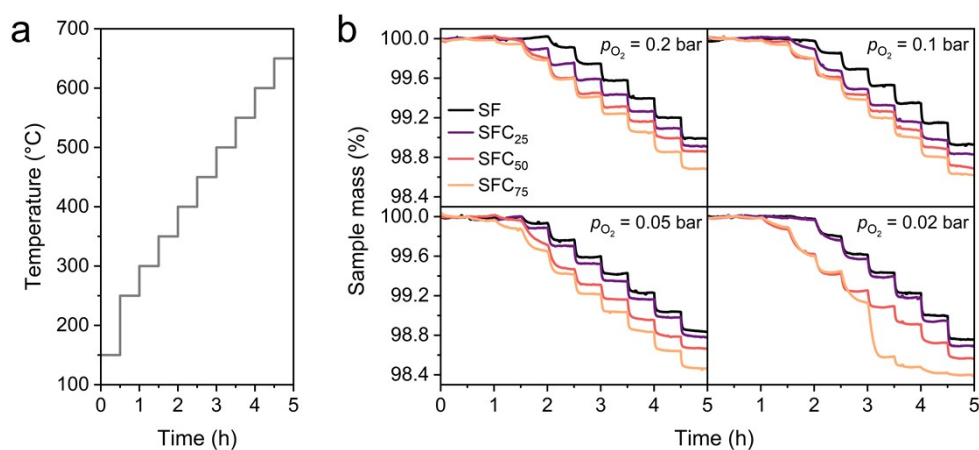

Figure S2. (a) Temperature program and (b) weight loss curves of the isothermal experiments under different oxygen partial pressure.

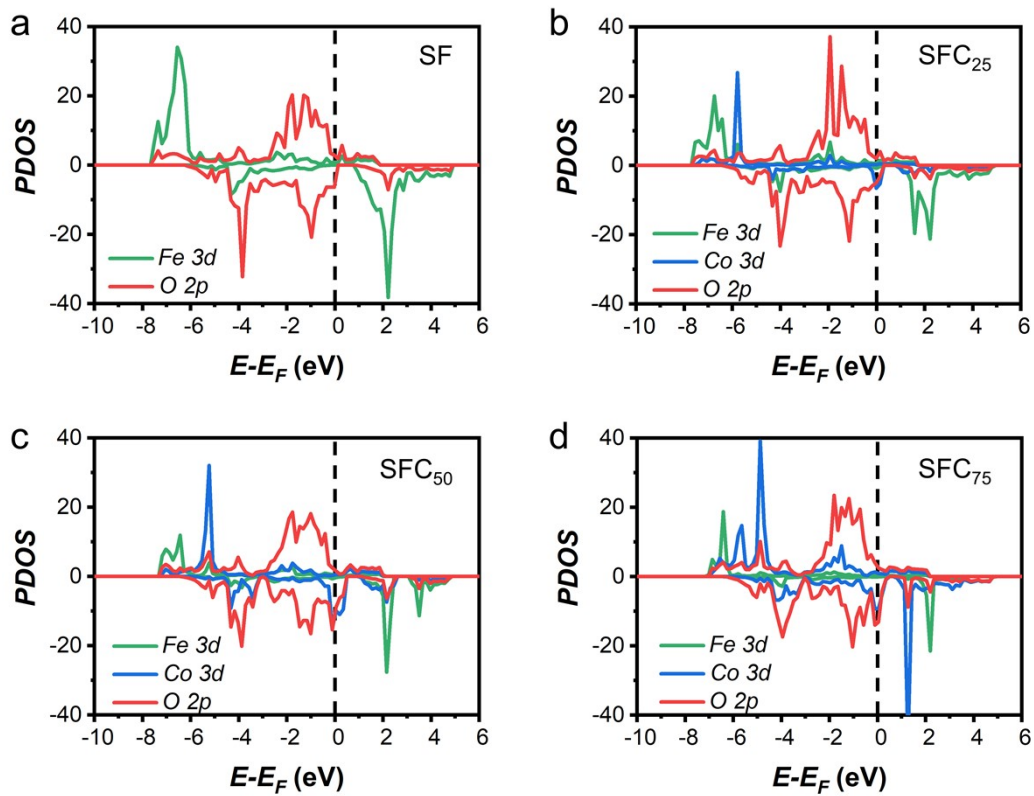

Figure S3. Calculated PDOS of the (a) SF, (b) SFC<sub>25</sub>, (c) SFC<sub>50</sub>, and (d) SFC<sub>75</sub> perovskite oxygen carriers.

1. L. K. Parmar, R. Joshi, P. Yadav, T. Garg, A. Kumar and A. Yadav, *Chemical Physics Impact*, 2024, **8**, 100603.
